# Supplementary material for: pH- and redox-triggered synergistic controlled release of a ZnO-gated hollow mesoporous silica drug delivery system
Source: Royal Society of Chemistry journal article supplement (doi:10.1039/c4tb01794c), 2014-12-17
Supplement: c4tb01794c1.pdf [file c4tb01794c1.pdf]

Supporting Information

for

**pH- and Redox-Triggered Synergistic Controlled Release of ZnO-  
Gated Hollow Mesoporous Silica Drug Delivery System**

Shanshan Wu, Xuan Huang and Xuezhong Du\*

*Key Laboratory of Mesoscopic Chemistry (Ministry of Education), School of Chemistry and  
Chemical Engineering, Nanjing University, Nanjing 210093, People's Republic of China*

E-mail: xzdu@nju.edu.cn

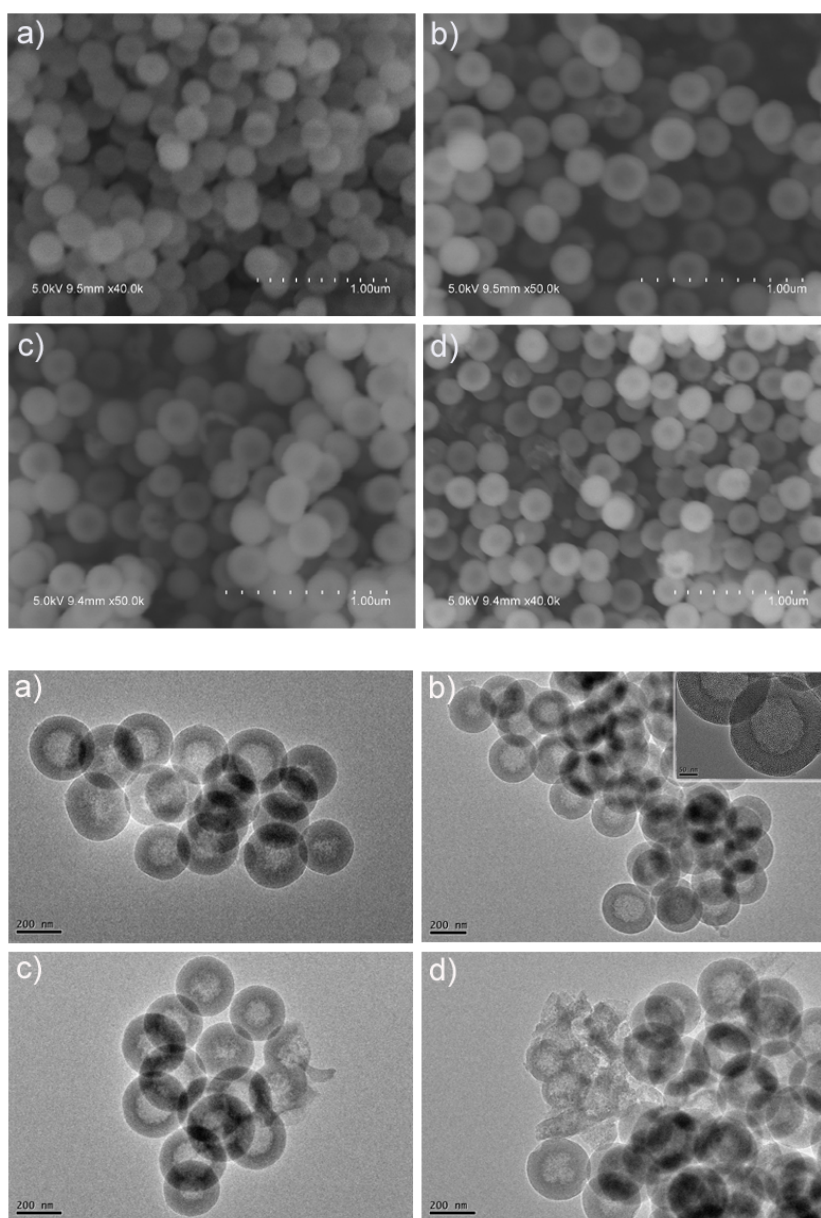

**Fig. S1** SEM (top) and TEM (bottom) images of (a) HMSS10, (b) HMSS12, (c) HMSS14, and (d) HMSS16. Inset shows a magnification TEM image.

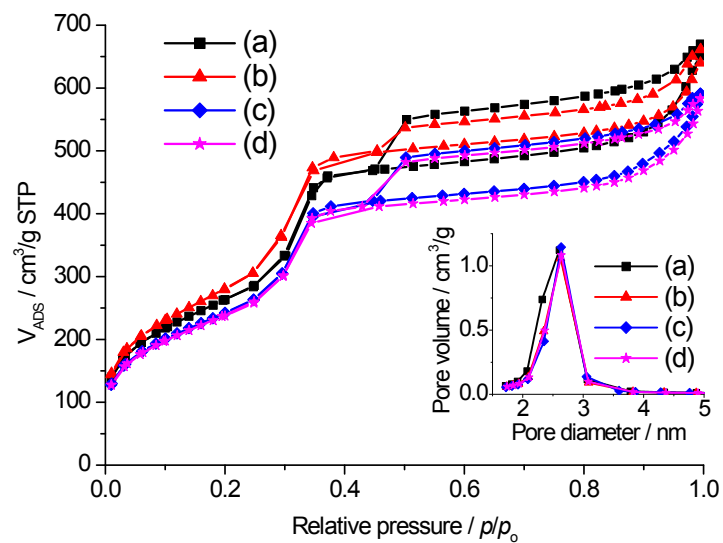

**Fig. S2** Nitrogen adsorption–desorption isotherms and pore size distributions of (a) HMSS10, (b) HMSS12, (c) HMSS14, and (d) HMSS16.

**Table S1** Specific surface area and average pore size of the HMSS materials based on the Brunauer–Emmett–Teller (BET) adsorption.

| materials             | surface area ( $\text{m}^2/\text{g}$ ) | pore size (nm) |
|-----------------------|----------------------------------------|----------------|
| HMSS10                | 967                                    | 2.6            |
| HMSS12                | 1029                                   | 2.6            |
| HMSS14                | 887                                    | 2.6            |
| HMSS16                | 870                                    | 2.6            |
| APTMS-modified HMSS12 | 749                                    | 2.0            |
| HMSS12-S-S-COOH       | 661                                    | 2.0            |

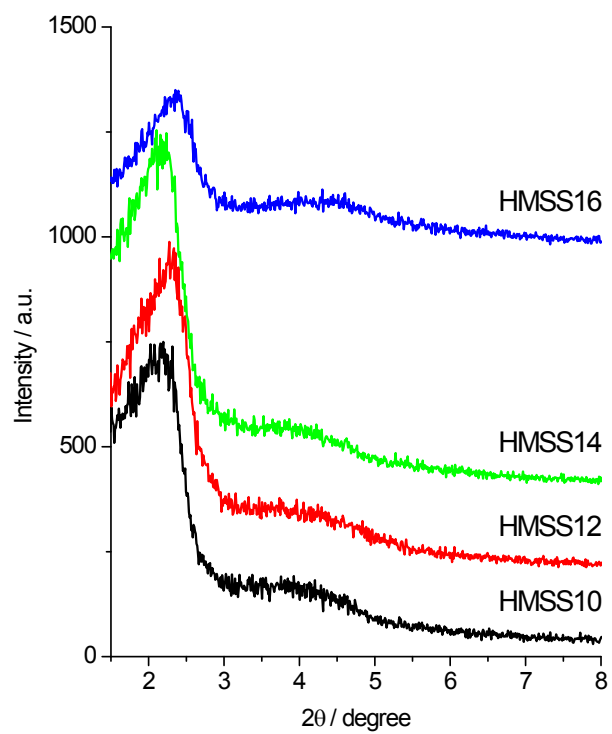

**Fig. S3** Small-angle powder XRD patterns of HMSS10, HMSS12, HMSS14, and HMSS16.

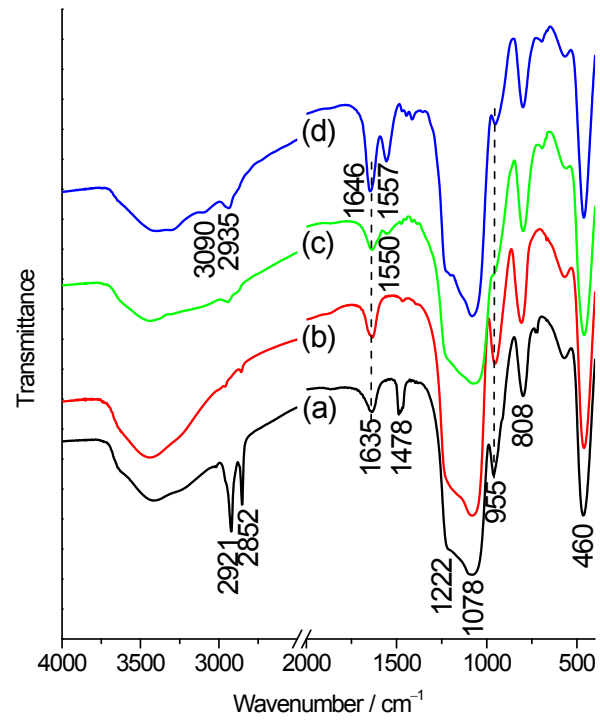

**Fig. S4** FTIR spectra of (a) HMSS12 before removal of CTAB, (b) HMSS12, (c) APTMS-modified HMSS12, and (d) HMSS12-S-S-COOH.

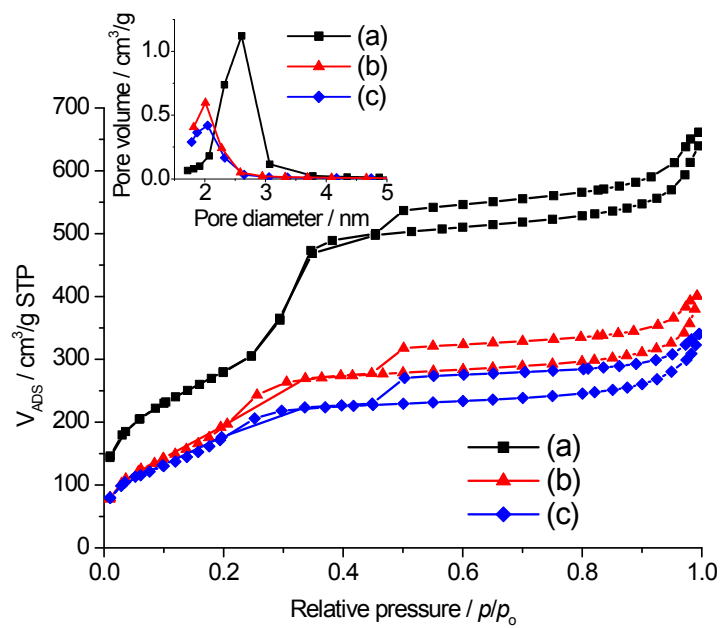

**Fig. S5** Nitrogen adsorption–desorption isotherms and pore size distributions of (a) HMSS12, (b) APTMS-modified HMSS12, and (c) HMSS12-S-S-COOH.

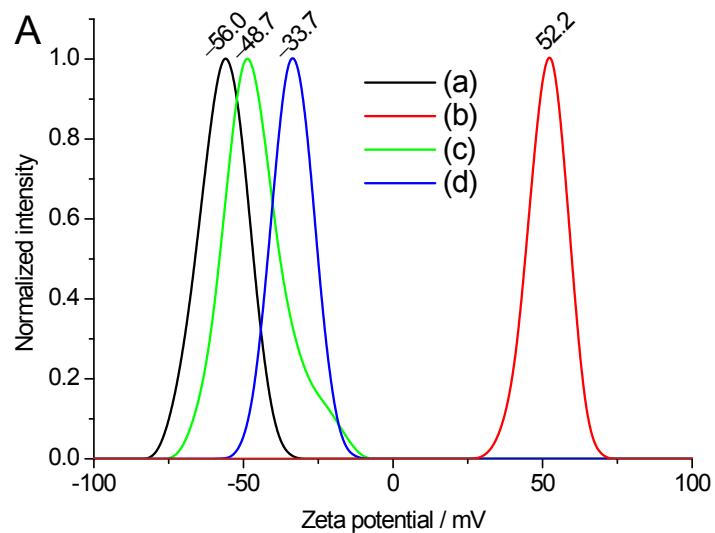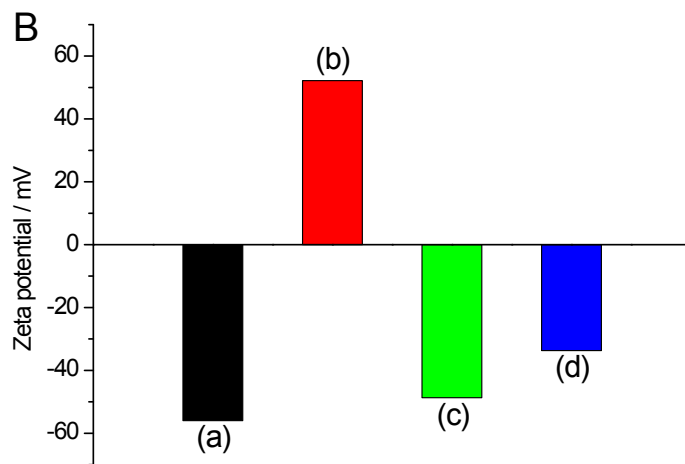

**Fig. S6** Zeta potentials of (a) HMSS12, (b) APTMS-modified HMSS12, (c) HMSS12-S-S-COOH, and (d) ZnO-capped HMSS12 presented in different forms A and B.

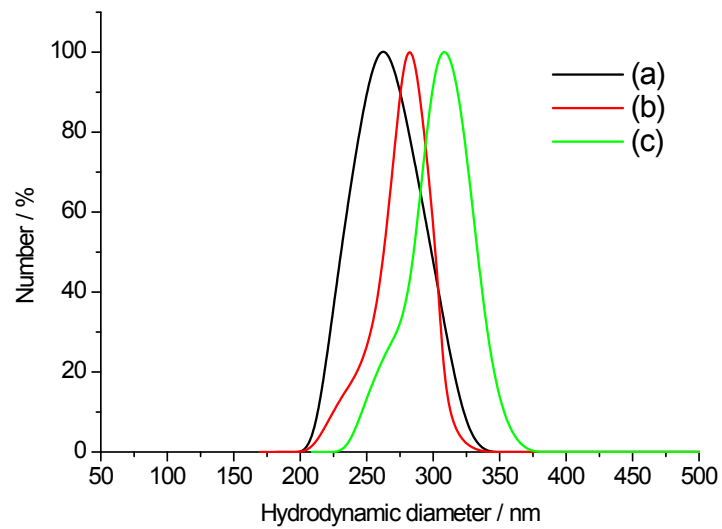

**Fig. S7** Hydrodynamic diameter distributions of (a) HMSS12, (b) HMSS12-S-S-COOH, and (c) ZnO-capped HMSS12.



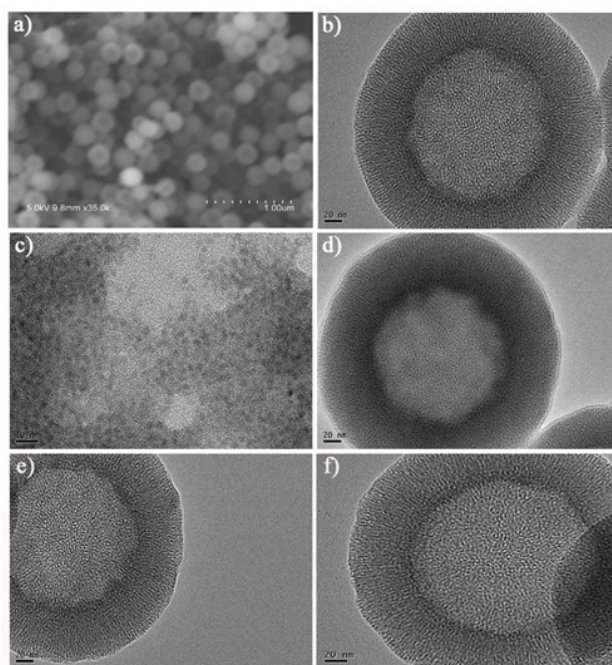

**Fig. S8** (a) SEM and (b) TEM images of HMSS12-S-S-COOH and TEM images of (c) aminated ZnO QDs, (d) ZnO-capped HMSS12, (e) ZnO-capped HMSS12 after trigger of pH in the HEPES buffer solution at pH 5.0, and (f) ZnO-capped HMSS12 after trigger of GSH (10 mM) in the HEPES buffer solution at pH 7.4.

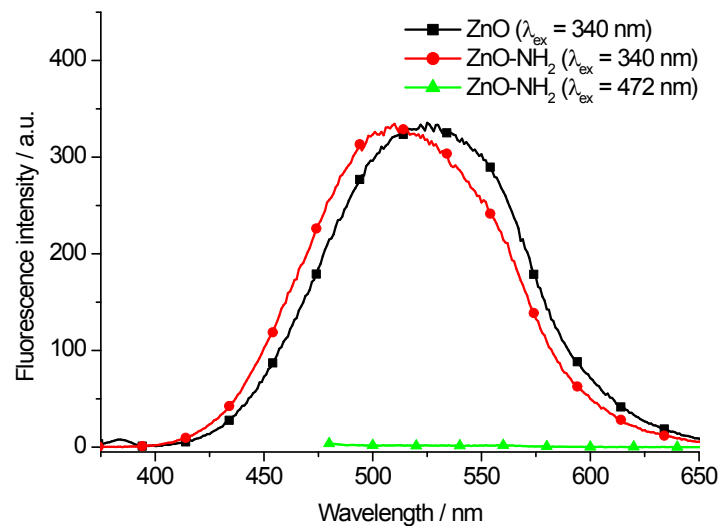

**Fig. S9** Fluorescence spectra of (a) ZnO QDs, (b) aminated ZnO QDs at the excitation wavelength of 340 nm, and (c) aminated ZnO QDs at the excitation wavelength of 472 nm.

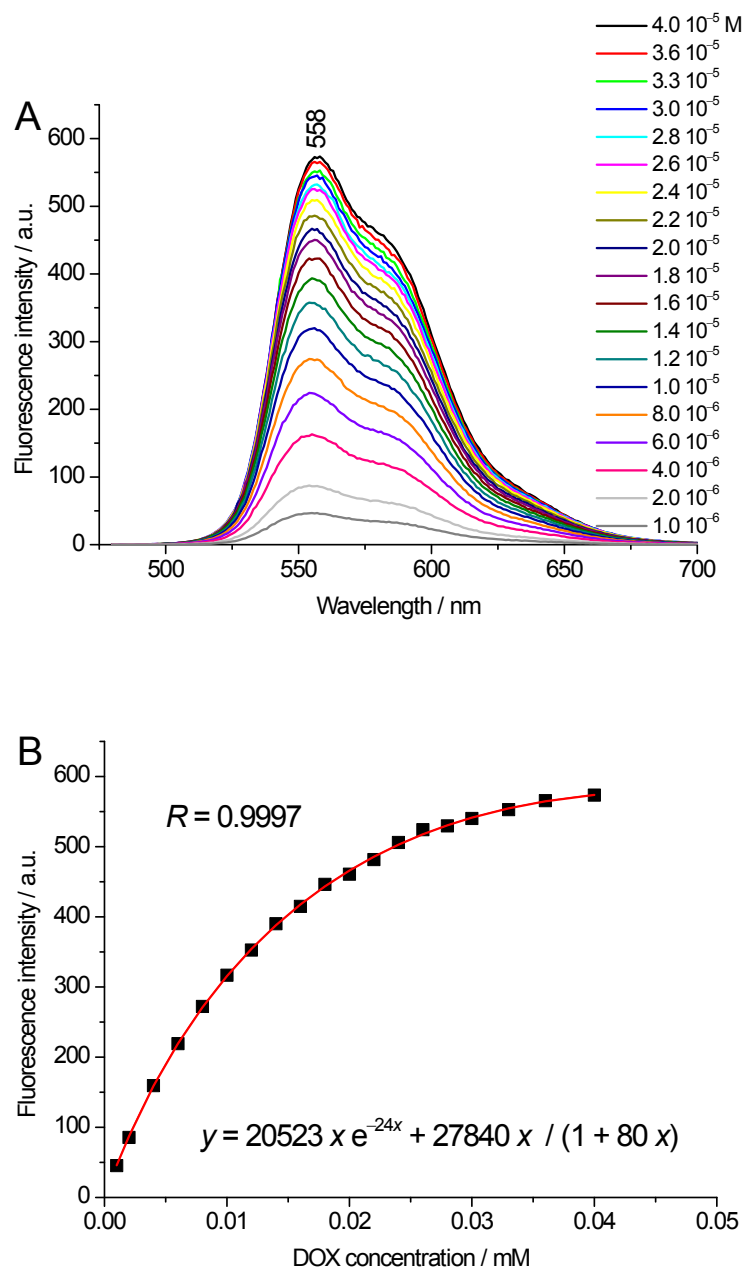

**Fig. S10** (A) Fluorescence spectra of DOX in HEPES buffer solutions (pH 7.4) with different concentrations. (B) Emission intensity at 558 nm as a function of DOX concentration. (C) Fluorescence spectrum of final washing solution containing unloaded DOX in 40 mL of HEPES buffer solution from the ZnO-capped HMSS12 system.

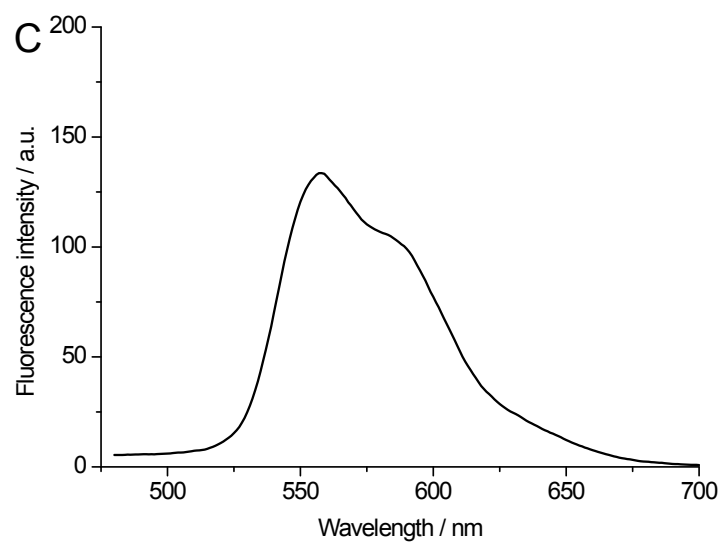

**Fig. S10** (continued)

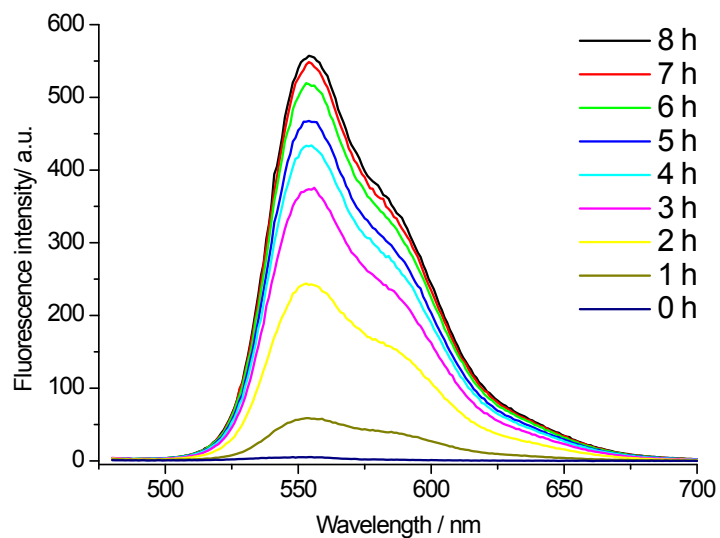

**Fig. S11** pH-triggered time-dependent fluorescence spectra of DOX released from the ZnO-gated HMSS12 system in the HEPES buffer solution at pH 3.0 at the excitation wavelength of 472 nm.

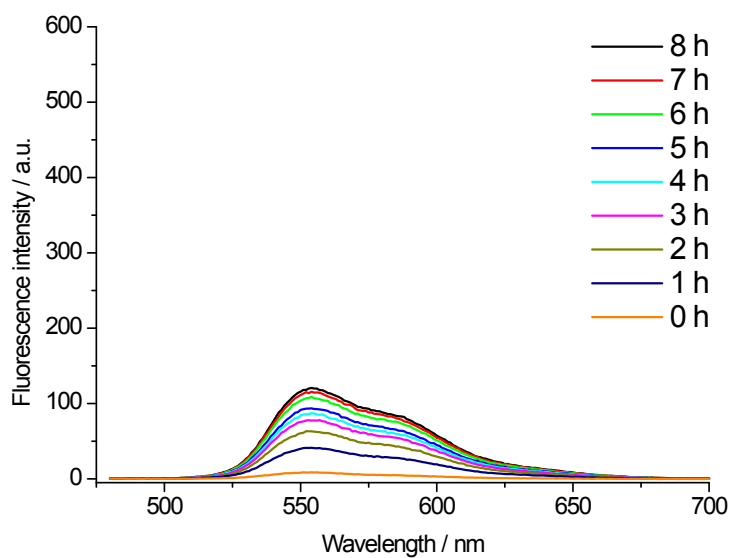

**Fig. S12** pH-triggered time-dependent fluorescence spectra of DOX released from the HMSS system without ZnO capping in the HEPES buffer solution at pH 3.0 at the excitation wavelength of 472 nm.

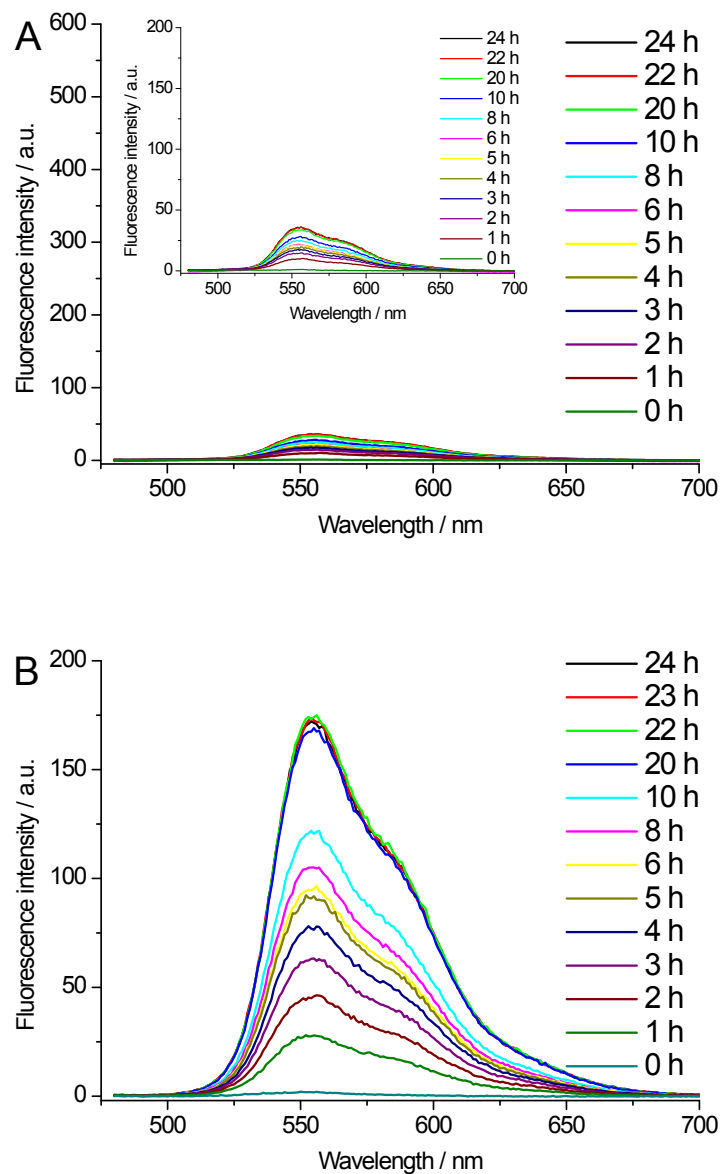

**Fig. S13** Time-dependent fluorescence spectra of DOX from the ZnO-gated HMSS12 system in the HEPES buffer solutions at pH 7.4 at the excitation wavelength of 472 nm: (A) premature release; (B) GSH (10 mM)-triggered controlled release; (C) DTT (10 mM)-triggered controlled release.

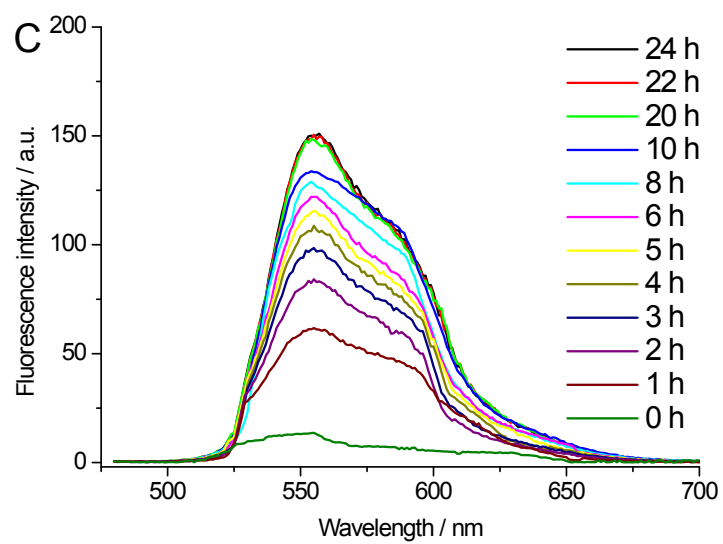

**Fig. S13** (continued)

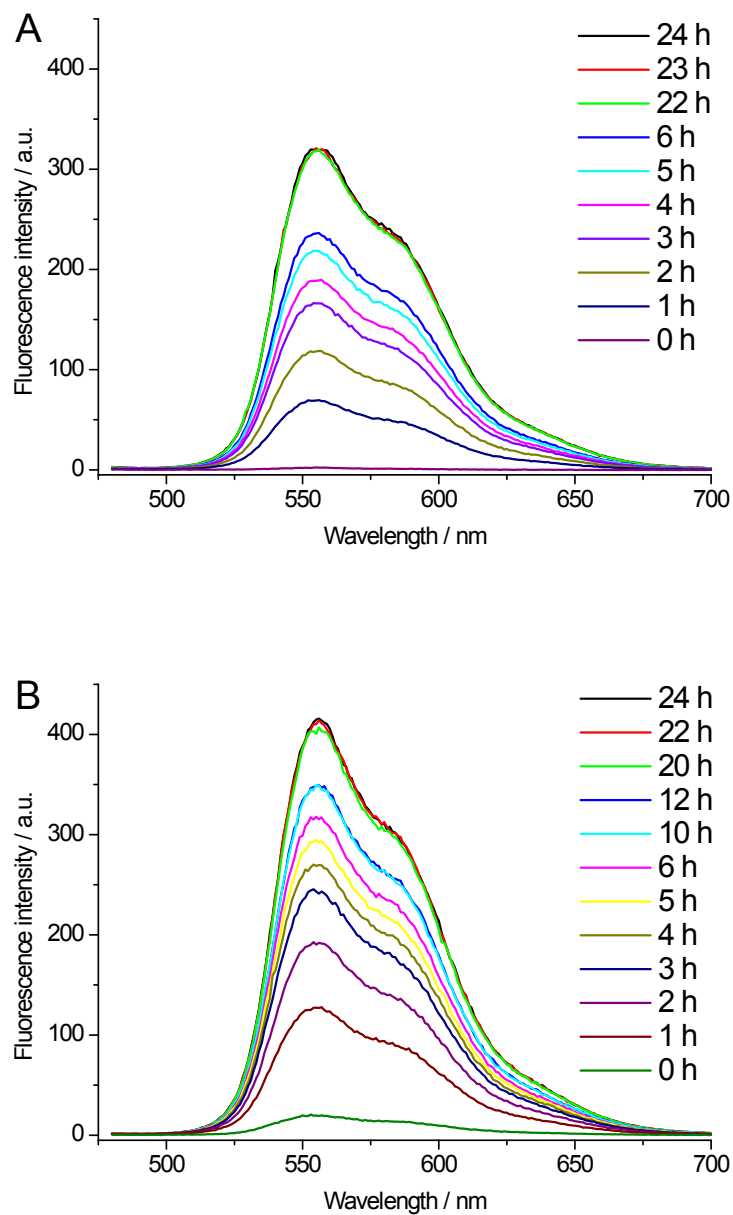

**Fig. S14** Time-dependent fluorescence spectra of DOX from the ZnO-gated HMSS12 system in the presence of GSH (10 mM) in the HEPES buffer solutions at different pH at the excitation wavelength of 472 nm: (A) pH 6.0; (B) pH 5.0.
